# Supplementary material
Source: Elsevier journal article supplement (https://www.sciencedirect.com/science/article/pii/S1579212916302750)
Supplement: mmc1 [file S1579212916302750:mmc1.pdf]

## **LA JUSTICIA Y EL AMIANTO**

*"... fui testigo de la lucha de estas gentes, lucha para que no se olvidara su presencia, lucha para delimitar responsabilidades, para conseguir indemnizaciones, para abrir los ojos de la opinión pública para conocer la peligrosidad de este material que todavía se encuentra cerca de nosotros, agazapado en nuestras casas, fábricas o lugares de ocio."* - La Plaza de la Música. Historias de Amianto de Juan Miguel Gu-  
tierrez.

### **1-Introducción.**

La Justicia y el Amianto han cohabitado en no pocas ocasiones, abordándose la reparación de los daños producidos por la exposición al Amianto desde distintas jurisdicciones. No obstante, la mayoría de las resoluciones son de tinte laboral, y más específicamente por la vía de la aplicación de las normas de prevención de riesgos laborales.

La rama social del derecho y su jurisdicción, presenta importantes peculiaridades que la distinguen notablemente de la veterana rama civil.

Es importante, antes de avanzar en esta espinosa materia, conocer las funciones del derecho social, pues sólo así puede entenderse la esencia y el sentido de la abundante jurisprudencia existente en torno a la responsabilidad ocupacional por riesgo y daños derivados del amianto.

Para ello se hace necesario exponer, sucintamente, las causas originarias del nacimiento del derecho del trabajo y su primigenia función social, que por cierto, no ha perdido actualidad con el paso de los siglos, cobrando un especial sentido en los actuales tiempos de "reformas" sociales permanentes, puestas en la mayoría de los casos, al servicio de los poderes económicos dominantes.

### **2- El derecho del trabajo: Protección social frente a explotación patronal**

El surgimiento del derecho laboral, como disciplina jurídica emancipada del derecho civil, no se produjo hasta bien entrado el s.XIX, teniendo como presupuesto social incuestionable la revolución industrial. Algunos autores han definido su nacimiento como *"una solución política, en nombre de una idea de justicia, a unos problemas sociales"*<sup>1</sup>.

<sup>1</sup> Borrajo Dacruz, Efen. Introducción al Derecho del trabajo. 9ª Edición, Editorial Tecnos.

Los convulsos cambios políticos, económicos y sociales decimonónicos eclosionaron en un nuevo sistema productivo a través de las factorías, donde la división del trabajo y la industrialización fueron el detonante del nacimiento de nuevas clases sociales: burgueses y proletarios. Al entorno descrito, se añadió la explosión demográfica europea y las legislaciones desamortizadoras de la propiedad rústica que ocasionaron un éxodo de los trabajadores del campo a la ciudad, con la caída del precio del trabajo ante el imparable aumento de la oferta.

Se impersonalizó el trabajo, y los obreros se hicieron fungibles, implantándose condiciones abusivas de explotación humana con mayor virulencia respecto de las mujeres y los niños. En algunas parroquias del sur de Inglaterra se vendían a los niños desde los 5 años para trabajar en las fábricas de algodón de Lancashire, imponiéndose en algunos contratos de "arrendamiento o venta de niño" que el empresario había de aceptar a cierto número de idiotas<sup>2</sup>. Ello llegó a tal extremo que en el decenio de 1830 sólo el 25% de los trabajadores de fábricas de algodón eran hombres de más de 18 años, el resto eran mujeres y niños<sup>3</sup>. Jornadas de entre 12 a 19 horas, con menos de una hora para la comida, dormitorios en la misma fábrica, pésimas condiciones higiénicas y trabajos prolongados originaron enfermedades, deformaciones, accidentes, mutilaciones etc.

Todos estos factores dieron lugar a lo que se puede llamar "*Cuestión obrera*", o concienciación colectiva de la clase proletaria ante la injusticia social a la que se veía sometida. La reacción frente a los abusos patronales impulsada por el movimiento obrero fue sustancial para la conquista del derecho del trabajo.

El derecho del trabajo nació como un dique limitador a los perjuicios obreros surgidos del libre juego entre la oferta y la demanda. Un dique tutelador de la dignidad del trabajador y su desvalida posición contractual, pues al sustraer un conjunto de normas imperativas básicas, del juego de la autonomía contractual, se concederá al trabajador un zócalo de derechos irrenunciables correctores de la libertad contractual.<sup>4</sup>

En España, la primera producción normativa, se asienta en leyes

---

<sup>2</sup> FOHLEN, citado por Migue Angel González Muñoz en Historia Social del Trabajo. Ediciones Júcar 1975

<sup>3</sup> FRIEDLAENDER citado por Migue Angel González Muñoz en Historia Social del Trabajo. Ediciones Júcar 1975

<sup>4</sup> Ramírez Martínez, Juan M. y Camps, L.M. . Derecho del Trabajo , 4ª edición - Edición- Bosch

protectoras en materia de seguridad social y condiciones laborales de menores. En 1.873 se prohíbe la admisión al trabajo a los menores de diez años<sup>5</sup> y en 1.878 se prohíbe la realización de actividades penosas, peligrosas o insalubres a los menores de quince años. Y ya en 1.900, fue promulgada la primera Ley de accidentes de trabajo seguida por muchas otras posteriores (maternidad, enfermedad profesional, enfermedad común, desempleo...), hasta que en 1.966 fue aprobada la primera ley de seguridad social que compiló la dispersión normativa existente hasta el momento.

La protección en supuestos de enfermedad profesional se inició en virtud de una sentencia del Tribunal Supremo de 1.903, al entender aplicable la ley de accidentes de trabajo a la enfermedad profesional, aunque no fue hasta 1.947 cuando se instaura como seguro, ampliándose su campo protector en 1961.

### **3-Las Enfermedades profesionales y el Accidente de trabajo, como contingencias de especial protección en el derecho laboral.**

Nuestro Sistema de la Seguridad se asienta sobre un sistema de protección mixto que se proyecta bajo dos ejes.

a)- Una protección de carácter universalista y no profesionalizada, que protege situaciones de necesidad del ciudadano.

b)- Y un sistema de protección profesional o vinculado al desarrollo de una actividad, que puede ser por cuenta ajena o por cuenta propia.

Dentro de la protección del Régimen General, o de trabajadores por cuenta ajena, se incluyen un total de cuatro riesgos protegibles<sup>6</sup>, que se encuadran en dos grupos genéricos, los denominados profesionales y los no profesionales.

Vamos a concentrar nuestra atención en los riesgos profesionales, donde quedan incluidas aquellas dolencias pulmonares o respiratorias vinculadas a la manipulación del amianto.

---

<sup>5</sup> Ley Benot

<sup>6</sup> Enfermedad común, enfermedad profesional, accidente no laboral y accidente laboral. Se deja al margen de este trabajo, el quinto riesgo protegido: la maternidad.

Dentro de los Riesgos Profesionales, se incorporan dos contingencias protegibles: El accidente de trabajo y las enfermedades profesionales. Estas últimas reguladas en el artículo 116 de la Ley General de la Seguridad Social (LGSS) y se desarrollan en el Decreto 1.299/2006 de 10 de noviembre, donde se encuadran de forma "cerrada" un listado de dolencias de distintas tipologías vinculadas a la realización de unas determinadas actividades. Por tanto, el desarrollo de una de las enfermedades de la lista, por parte de un trabajador adscrito a esas específicas actividades es una presunción (indestructible o "*iure et de iure*"), de que se trata de una enfermedad profesional.

La enfermedad profesional está dotada de unas condiciones de protección dulcificadas y más favorables respecto de la enfermedad común, tanto económicamente (cuantía de las prestaciones), como asistencial o farmacéuticamente. Toda la cobertura corre a cargo de la Mutua correspondiente y no del Servicio Público de Salud<sup>7</sup>.

Otro de los efectos genuinamente vinculado a la enfermedad profesional, es la eventual aplicación de medidas sancionadoras a la empresa, en caso de incumplimiento de sus obligaciones en materia de prevención de riesgos laborales o cuando la enfermedad se produzca porque no se hayan observado las medidas generales o particulares de seguridad o higiene en el trabajo, o las de adecuación personal a cada trabajo.

La enfermedad profesional es atendida desde tres ámbitos diferentes: el sistema sanitario, el preventivo y el de seguridad social que vertebra el concepto e implicaciones de las mismas.

La exposición laboral al amianto, ha venido contando con normas de aplicación indirecta, en materia de preventiva, en España desde el año 1940, aunque hasta 1.961 no se incluyó expresamente la asbestosis como enfermedad profesional, y también se limitó reglamentariamente la concentración máxima de amianto en lugares de trabajo.

En 1978 se añaden como enfermedades profesionales, el mesotelioma pleural y peritoneal y en 1984 se aprueba el reglamento sobre trabajos con riesgo por amianto.

El 24 de junio de 1986 se ratifica el Convenio nº162 de la OIT<sup>8</sup> y por fin, en diciembre de 2001, España se adelanta al plazo máximo

<sup>7</sup> Las Mutuas colaboradoras con la Seguridad Social, son asociaciones privadas de empresarios, sin ánimo de lucro debidamente autorizadas, según dispone la Ley 35/2014 de 26 diciembre.

<sup>8</sup> Sobre la utilización del asbestos, en condiciones de seguridad.

dado por la UE<sup>9</sup>, prohibiendo la comercialización y la utilización del crisolito (amianto blanco), que era el único tipo que todavía seguía siendo utilizado en España. Pero no debe olvidarse que el reconocimiento por la comunidad científica de las enfermedades por exposición al amianto, especialmente su relación con las neoplasias, eran incuestionables, sobre todo, desde las publicaciones de dos estudios epidemiológicos en 1964 y 1965 dirigidos por Irving Selikoff, médico del *Mount Sinai School of Medicine* de Nueva York.

Lo daños derivados de una enfermedad profesional, pueden generar, según las circunstancias, las siguientes prestaciones:

a)-Prestaciones de la Seguridad Social cuyo devengo es automático y no se ve afectado por la culpa, fuerza mayor o caso fortuito.

b)-Responsabilidades penales. El delito contra el derecho de los trabajadores se regula en el artículo 316 del Código penal.

c)-Indemnización Civil por daños y perjuicios, con amparo en los artículos 1.101 y 1902 del Código civil (culpa contractual o extracontractual). En su cuantificación viene utilizándose por los órganos judiciales, el baremo de cálculo de indemnizaciones en accidentes de tráfico, regulado en el Real Decreto legislativo 8/2004 que aprueba el texto refundido de la ley sobre responsabilidad civil y seguro en la circulación de vehículos a motor.

d)-Recargo de prestaciones, regulado en el artículo 123 de la LGSS, que permite el aumento de un 30% a un 50% de la prestaciones derivadas de contingencias profesionales.

e)- Y sanciones administrativas frente a la empresa por incumplimiento de la normativa social en materia de prevención de riesgos laborales. Este tipo de sanción procede siempre que se constate el incumplimiento empresarial de una norma objetiva, con independencia del daño que se haya podido producir al trabajador afectado, y tiene un carácter híbrido, entre sancionador y prestacional, además de ser un factor disuasorio para las empresas incumplidoras.

#### **4-La Respuesta de la Justicia ante los daños por exposición al amianto: "El dolor que no prescribe"**

<sup>9</sup> Directiva 1999/77/CE, de 26 de julio, cuyo periodo de transposición finalizaba el 1 de enero de 2005.

Las Resoluciones judiciales recaídas, no tienen una jurisdicción monolítica, aunque mayoritariamente han venido siendo los órganos de lo social los que han abordado este tipo de reclamaciones, pues la fibra de amianto fue muy utilizada por numerosas industrias (naval, ferroviaria, automovilística, cemento, electrodomésticos etc) durante la segunda mitad del s.XX.

Entre 1996 y 2008, las Audiencias Provinciales, los Tribunales Superiores de Justicia y el Tribunal Supremo dictaron al menos 115 resoluciones en materia de responsabilidad civil o responsabilidad patrimonial de la Administración por daños del amianto. Del total de 115 resoluciones, 45 condenaron a indemnizaciones entre 17.213 y 240.000 euros. Mayoritariamente eran demandantes operarios que contrajeron mesotelioma, asbestosis u otras enfermedades por contacto con amianto, o sus familiares. Y las demandadas eran las empresas empleadoras.<sup>10</sup>

**-La Jurisdicción CIVIL,** es competente para resolver aquellas reclamaciones en las que no ha existido vinculación laboral con la víctima, aunque no siempre ha sido así, y aplica criterios diferentes a la jurisdicción social en el cálculo de las indemnizaciones.

Debe destacarse la mediática sentencia dictada por el juzgado de 1ª Instancia nº 46 de Madrid de julio de 2010, que condenó a Uralita a abonar casi 4 millones de euros a 47 vecinos que vivían en las inmediaciones de la fábrica, y se reconoce como medios de transmisión del amianto causante de sus enfermedades respiratorias, desde las emisiones de la fábrica demandada, en forma de polvo de amianto, la manipulación de las ropas de los trabajadores por parte de sus familiares en sus domicilios y la contaminación derivada de la degradación de los depósitos de residuos derivados de la propia actividad industrial. Aunque fue una sentencia pionera, debe recordarse que la Audiencia Provincial de Madrid, la revocó, dos años después (2012), estimando la prescripción de las acciones, esto es, que se habían planteado superado el plazo civil para reclamar, y aunque posteriormente fue recurrida ante el Tribunal Supremo (Sala Civil), actualmente se halla pendiente de resolución.

**-La Jurisdicción SOCIAL,** se ha pronunciado mayoritariamente en materia de recargo de prestaciones derivadas de enfermedad

<sup>10</sup> Azagra Maco, A. ; La tragedia del amianto y el derecho español. Atelier libros jurídicos -2007

profesional y en reclamaciones por daños y perjuicios de carácter civil o determinación de contingencia. Hay que destacar la importante evolución que se ha producido desde los años 90 hasta el momento actual.

En este tipo de procesos resulta imprescindible, para conseguir la tutela judicial, la probanza de los siguientes elementos.

- Daño producido al trabajador en forma de enfermedad respiratoria o pulmonar vinculada al amianto.

- Nexo causal entre la enfermedad y la manipulación o, en su caso, exposición o contacto directo o indirecto con el amianto durante un tiempo necesario para desarrollar la enfermedad.

- Incumplimiento empresarial,(la culpa), de la normativa existente en el momento geográfico-temporal, en el que el trabajador afectado manipuló o se expuso al amianto.

Entre las primeras sentencias dictadas por el **Tribunal Supremo (TS), debe destacarse la de 30 de noviembre de 1997**, que resolvió la acción de daños y perjuicios planteada por la hija de una trabajadora expuesta a la crocidolita (amianto azul) entre 1962 y 1983 y que fue declarada en Incapacidad Permanente en grado de absoluta por padecer asbestosis pulmonar y mesotelioma pleural falleciendo como consecuencia de tales enfermedades. Se denegó la indemnización en la instancia pero se le reconoció por el Tribunal Superior del País Vasco, condenando a la empresa a abonarle 5 millones de pesetas, pero el TS, estimó el recurso de la empresa en base a que la misma cumplió con la normativa vigente y los requisitos legales exigibles en materia de seguridad e higiene en el trabajo durante el periodo de prestación de servicios de la madre de la actora. Si no existe culpa, la indemnización es improcedente. Esta primera sentencia tuvo un efecto disuasorio, durante años, en la interposición de otras reclamaciones judiciales similares evidenciando un cierto estrabismo dextrógiro judicial.

Pero a partir del año 2000 fueron dictándose nuevas sentencias de otro signo, más protector para los trabajadores, como la Sentencia **del Tribunal Superior de Justicia (TSJ) del País Vasco de 22 de mayo de 2001**, en la que se reconoce derecho al percibo

indemnización a los hijos y esposa de trabajador fallecido como consecuencia de trabajos realizados durante los años 1965 a 1983, recubriendo la estructura de vagones con amianto.

**El TSJ Catalunya en fecha 10 de noviembre de 2005** dictó sentencia estimatoria de demanda de reclamación de daños y perjuicios ejercida por viuda e hijos de un trabajador fallecido como consecuencia de un mesotelioma maligno, que había prestado servicios entre 1961 y 1983 en el centro de trabajo URALITA de Cerdanyola, donde fabricaba tubos de fibrocemento compuesto con fibra de amianto.

**Sentencia del TSJ del País Vasco de 24 de mayo de 2005.** Que resolvió el pleito planteado en reclamación de indemnización de daños y perjuicios por viuda de obrero fallecido expuesto a amianto ocupacional durante doce años (1969 a 1981), con el siguiente diagnóstico: mesotelioma sarcomatoso izquierdo, metástasis múltiples y pulmonares contralaterales, invasión de pared torácica, asma y éxitus. La empresa no facilitó al trabajador equipo de protección alguno ni realizó mediciones de partículas de amianto en el aire.

Afortunadamente la hermética escafandra del Alto Tribunal dio un giro jurisprudencial que se produjo a partir de **la sentencia del TS de 30 de junio de 2010 (Sala General)**, en un supuesto de responsabilidad civil derivada de accidente de trabajo, en la que por primera vez el requisito de la culpa empresarial deja de exigirse en un sentido clásico, dada la posición de garante de seguridad que debe asumir la empresa de conformidad con su obligación de protección de la salud obrera. La anterior obligación, tiene como consecuencia lo que jurídicamente se denomina, inversión de la carga de la prueba, y tras la reforma de la ley procesal laboral<sup>11</sup> ya ha sido recogida expresamente en el artículo 96 de la ley rituarial laboral. Actualmente se exige a la empresa la carga de probar que ha adoptado todas las medidas necesarias para prevenir o evitar el riesgo de contraer una enfermedad profesional.

**La sentencia del TS de 6 marzo 2012,** ratifica otra del TSJ del País Vasco, en la cual se desestima el recurso de la empresa frente a sentencia que la condenó a abonar a los herederos del trabajador, la cantidad de 104.837 euros de indemnización de

<sup>11</sup> Ley 36/2011, de 10 de octubre, reguladora de la Jurisdicción Social.



daños y perjuicios. El operario prestó servicios entre 1956 y 1966, en la construcción de vagones con revestimiento de amianto y en octubre 2006 fue diagnosticado de mesotelioma pleural izquierdo de origen profesional, falleciendo en 2007. La empleadora durante el tiempo que duró la relación laboral, no tenía instalado ningún sistema de extracción localizada en los procedimientos de manipulación de amianto en los que se podía producir desprendimientos de fibras, y no informó a los trabajadores del riesgo de la exposición al amianto ni llevó a cabo una vigilancia de la salud específica para detectar posibles consecuencias de dicha exposición. El pronunciamiento de instancia sostiene que hubo negligencia empresarial por falta de adopción de medidas de prevención del trabajador, existiendo una relación de causalidad directa entre el daño y el incumplimiento culpable de la empresa.

Es particularmente contundente, **la Sentencia dictada por el TSJ de Cataluña de 2 de febrero de 2012**, en la que se afirma que *"el polvo de amianto era una sustancia que las empresas tenían obligación, como mínimo desde 1.947, de evitar en orden a preservar la salud de los trabajadores, como consecuencia de su elevado riesgo (...) pues la comunidad científica a nivel mundial, conocía los efectos y las consecuencias de la exposición al amianto"*

**Sentencia del TS de 16 de febrero de 2015.** En este caso se discutía directamente si la muerte del trabajador, que dio lugar a la reclamación de viudedad se produjo por causa de enfermedad común o bien enfermedad profesional. El causante prestó servicios para la empresa entre 1951 y 1.982, como tornero, listero y boletero. En dicha empresa se realizaban trabajos que comportaban la manipulación de amianto. El causante, fumador y con bronquitis crónica, fue diagnosticado de carcinoma broncogénico en 1985 y falleció posteriormente tras metástasis. Se calificó la dolencia de enfermedad profesional partiendo de la prueba de que el trabajador había permanecido durante décadas en contacto con el amianto y que ello triplica las posibilidades de sufrir el tipo de cáncer que le afectó mortalmente. Pero la sentencia del juzgado social fue revocada por el TSJ Catalunya en 2014, y aquí el TS no admitió el recurso de casación.

**Sentencia del TS de 17 de marzo de 2015**, que desestimó el recurso planteado por la empresa. El supuesto era el de un trabajador declarado en situación de incapacidad permanente en

grado de absoluta derivada de enfermedad profesional por las lesiones de asbestosis con insuficiencia ventilatoria severa. El actor había prestado servicios para la empresa Rocalla SA que fue sucedida por Uralita SA en 1.995, como pulidor entre 1.963 y 1992. Quedó probado que Rocalla SA entre 1929 y 1993 se dedicó a la fabricación de material de fibrocemento con amianto. El juzgado reconoció al obrero una indemnización de 200.000 euros por daños derivados de la enfermedad profesional, que fue ratificada por el TSJ Cataluña, e interpuesto recurso por la empresa, fue desestimado por el TS, aunque sin entrar en el fondo. Se alegaba por la demandada, la prescripción de la acción, entre otros motivos. La Sentencia del TSJ fija la fecha de inicio del cómputo del año de prescripción de la acción, en la fecha de la declaración de la Incapacidad Permanente Absoluta. La prescripción es la excepción procesal estrella en este tipo de procesos, en que tratamos con dolencias cuya manifestación requiere un largo periodo de latencia, como ocurre en el caso de las enfermedades pulmonares o respiratorias vinculadas al asbestos.

Y no podemos acabar este paseo jurisprudencial sin hacer alusión a una importantísima sentencia que desde hacía años se reclamaba por parte de la Doctrina iuslaboralista; **la sentencia del TS en fecha 23 de marzo de 2015 (Sala general)**. Esta resolución declara que en caso de sucesión de empresas, la nueva empleadora será también responsable de las deudas de la anterior en concepto de recargo de prestaciones por infracción de normas en materia de prevención de riesgos laborales.

Se rectifica así la doctrina precedente que impedía esta posibilidad al entender que el recargo tiene un carácter sancionador que lo excluye de la sucesión. En el caso analizado, se trataba de la fusión por absorción de Rocalla SA. por Uralita SA. Se ampara el TS en una reciente sentencia del Tribunal de justicia de la UE.

Poco antes de finalizar este artículo el Tribunal Supremo (Sala civil), nos sorprendía con una novedosa resolución que reconoce el derecho a percibir indemnizaciones a tres amas de casa (una de ellas ya fallecida), cuya relación con el amianto fue indirecta, al no mediar relaciones laborales entre ellas y las empresas demandadas.

No obstante , ello no impidió su contacto continuado y durante años, con las fibras de asbestos, pues eran esposas de

trabajadores de la demandada URALITA SA , a los que lavaban a diario sus uniformes de trabajo usados en la prestación de sus servicios laborales con las demandadas.

Lo novedoso es que el Alto Tribunal, reconoce indemnizaciones a las esposas por la vía de la responsabilidad extracontractual, (y no de trabajo), en aplicación de "la doctrina del riesgo", por omisión de la diligencia extrema que cabía exigir a las demandadas en atención a un riesgo previsible, que se invoca para poner de manifiesto la conducta de los demandados y el peligro creado por el material empleado.

Se analiza así si Uralita SA. Cumplió ( o no) con la diligencia exigible frente a terceros ajenos a las relaciones laborales, tras conocerse a partir de los años cuarenta el alto riesgo que conllevaba la exposición al polvo de amianto, entendiendo el Tribunal que dicha diligencia no fue cumplida, condenándose así a la mercantil a indemnizar a las amas de casa demandantes. **(Sentencia de la Sala 1ª del Tribunal Supremo nº 639/2015 de 3 de diciembre de 2015, Recurso nº 558/2014, ponente: Excmo. Sr. Don Jose Antonio Seijas Quintana).**

## **5-La importancia de la prueba pericial médica en los procesos de daños por amianto.**

Hasta aquí hemos analizado la posición de la justicia frente a los daños derivados de la exposición ocupacional al amianto. También se han expuesto los requisitos jurídicos exigidos para maximizar el éxito de una demanda y hasta los criterios jurisprudenciales y su evolución, pero no podemos acabar este artículo sin hacer referencia, siquiera sucinta, a la importancia de la prueba estrella en este tipo de procedimientos judiciales: La prueba pericial médica.

La aportación de informes médicos que puedan llevar al juzgador por la senda de la convicción del nexo causal entre la exposición al asbestos y el desarrollo de una enfermedad respiratoria característica, es sin duda importante, pero debe recordarse que, salvo los informes administrativos, es imprescindible la ratificación judicial por parte del perito, en este caso médico, para que despliegue eficacia jurídica y procesal.

El perito es aquella persona experta en una materia concreta, que acredita mediante la correspondiente titulación. Podrá proponerse de parte (perito privado), o bien de oficio o a petición, podrá requerirse la intervención de un médico forense, este último siempre va a gozar de mayor credibilidad judicial, dada su imparcialidad, pero normalmente no son especialistas en neumología, por lo que jugarán en desventaja a la hora de ilustrar al juez en el desarrollo de una asbestosis, mesotelioma o cáncer de pulmón.

Por mi experiencia con la justicia, como abogada antes y como magistrada ahora, mis **recomendaciones para lograr una óptima pericial médica**, convincente y con posibilidades de ser el fundamento de una sentencia favorable, son sustancialmente dos.

-La primera consiste en aportar un informe pericial con buena estética formal, ordenado, ni demasiado largo ni demasiado corto, que sea claro, directo e inteligible para el juzgador.

-Y la segunda consiste en una ratificación judicial del informe o "*puesta en escena*", en la que el experto destile seguridad, convicción, credibilidad, y sobre todo honestidad, ello aliñado con un alto nivel de respeto hacia la sala y resto de interlocutores presentes en el acto del juicio.

Los neumólogos tienen un papel judicial protagonista para acercar la justicia al amianto, tienen un papel protagonista para mejorar la calidad de vida de las víctimas, y tienen, en fin, una importante misión social que debe serles reconocida, en la lucha frente al asbestos.
